# Supplementary material for: Exploring the Impact of Maternal Gatekeeping on Paternal Parenting and Adolescent Aggression
Source: Preprints.org preprint supplement (doi:10.20944/preprints202404.1275.v1), 2024-04-19
Supplement: Supplementary file 3 [file supplementary]

**Supplemental materials**

| **Table S1**  **Results of Pearson correlation analysis between variables in the conventional families** | | | | | | | | |
| --- | --- | --- | --- | --- | --- | --- | --- | --- |
|  | 1 | 2 | 3 | 4 | 5 | 6 | 7 | 8 |
| 1 AQ-total | 1.00 |  |  |  |  |  |  |  |
| 2 Father’s warmth and affection | -.098* | 1 |  |  |  |  |  |  |
| 3 Father’s refusal | .404** | -.384** | 1 |  |  |  |  |  |
| 4 Father’s overprotection | .447** | -.173** | .638** | 1 |  |  |  |  |
| 5 Paternal involvement | -.109* | .657** | -.278** | -.074 | 1 |  |  |  |
| 6 Mother’s warmth and affection | -.049 | .793** | -.281** | -.180** | .464** | 1 |  |  |
| 7 Mother’s refusal | .425** | -.298** | .748** | .558** | -.246** | -.382** | 1 |  |
| 8 Mother’s overprotection | .412** | -.123* | .483** | .778** | -.047 | -.198** | .625** | 1 |
| 9 Maternal closing behavior | .296** | -.103* | .284** | .280** | -.132** | -.065 | .349** | .336** |

AQ: aggression questionnaire; *, p < 0.05; **, p <0.01.

**Figure S1**

**The latent classes of parenting in conventional families**

**Figure S2**

**The differences in paternal parenting between different classes in conventional families**

GK: gatekeeping behavior;

**Figure S3**

**The differences in adolescents aggression between different classes in conventional families**

GK: gatekeeping behavior; AQ: Buss-perry aggression;
